# Supplementary material
Source: PubMed Central journal article supplement (PMC7643424)
Supplement: TBSD_A_1835721_SM5381.pdf [file TBSD_A_1835721_SM5381.pdf]

## Supplementary Information

### High Throughput Virtual Screening of Drug Databanks for Potential Inhibitors of SARS-CoV-2 Spike Glycoprotein

Ibrahim E. Awad<sup>\*a</sup>, Abd Al-Aziz A. Abu-Saleh<sup>a</sup>, Sweta Sharma<sup>b</sup>, Arpita Yadav<sup>b</sup>,  
and Raymond A. Poirier<sup>\*a</sup>

<sup>a</sup>Department of Chemistry, Memorial University of Newfoundland  
St. John's, Canada A1B 3X7

<sup>b</sup>Department of Chemistry, University Institute of Engineering and Technology  
Chhatrapati Shahu Ji Maharaj University, Kanpur, India 208024

\*Corresponding author

E-Mail: [rpoirier@mun.ca](mailto:rpoirier@mun.ca); [iawad@mun.ca](mailto:iawad@mun.ca)

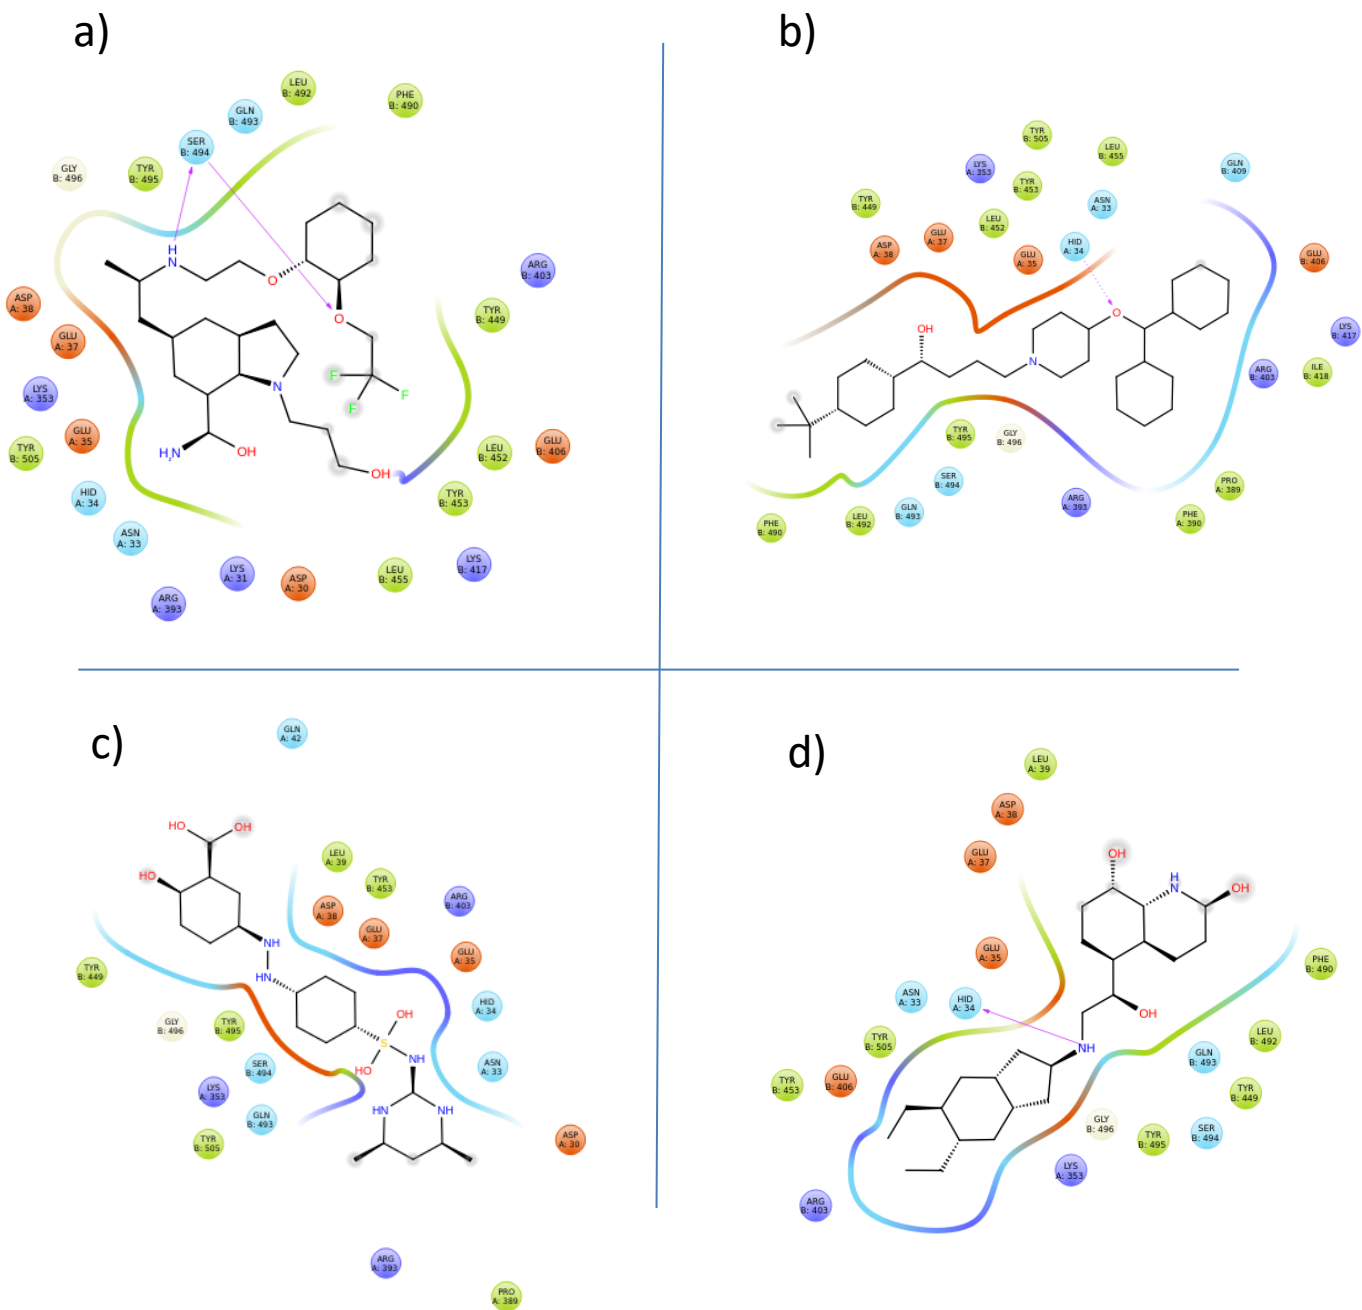

**Figure S1.** Ligand interaction 2D maps for a) silodosin b) ebastine, c) salazosulfadimidine, and d) indacaterol obtained using best docking configurations. Residues with A indicates ACE2 and residues with B indicates SARS-Cov-2 spike RBD.

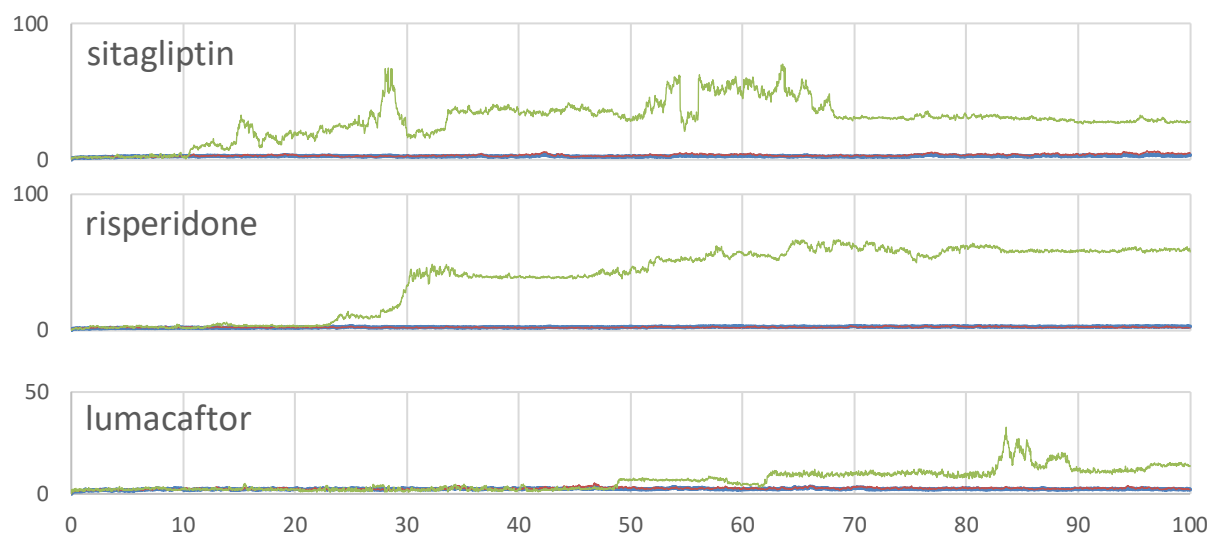

**Figure S2.** RMSD analysis for a) sitagliptin, b) risperidone, and c) lumacaftor. The light green represents the ligand, blue color represents ACE2, and red color represents the SARS-CoV-2 Spike RBD.

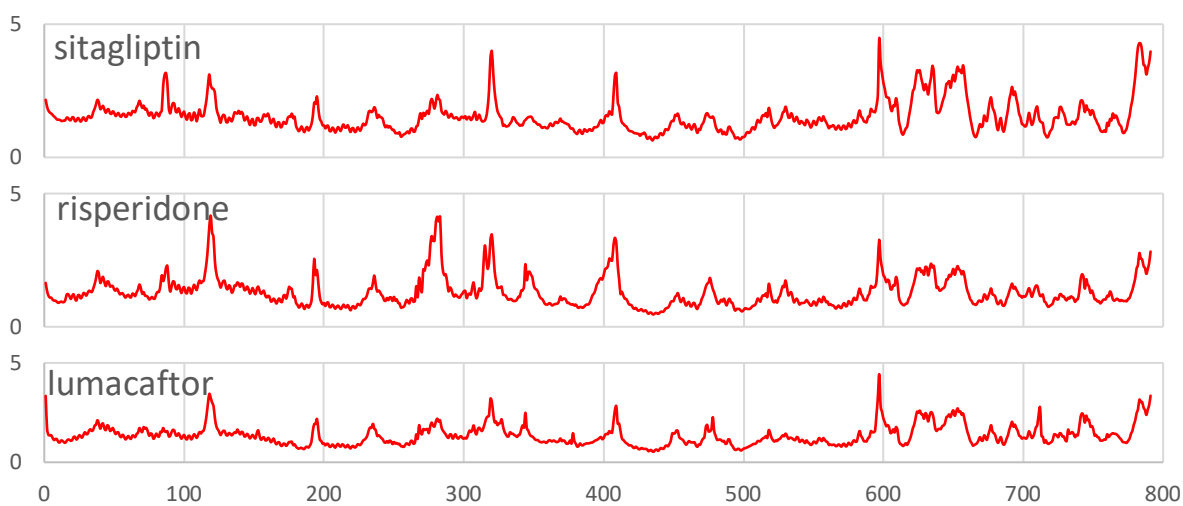

**Figure S3.** RMSF analysis for a) sitagliptin, b) risperidone, and c) lumacaftor.

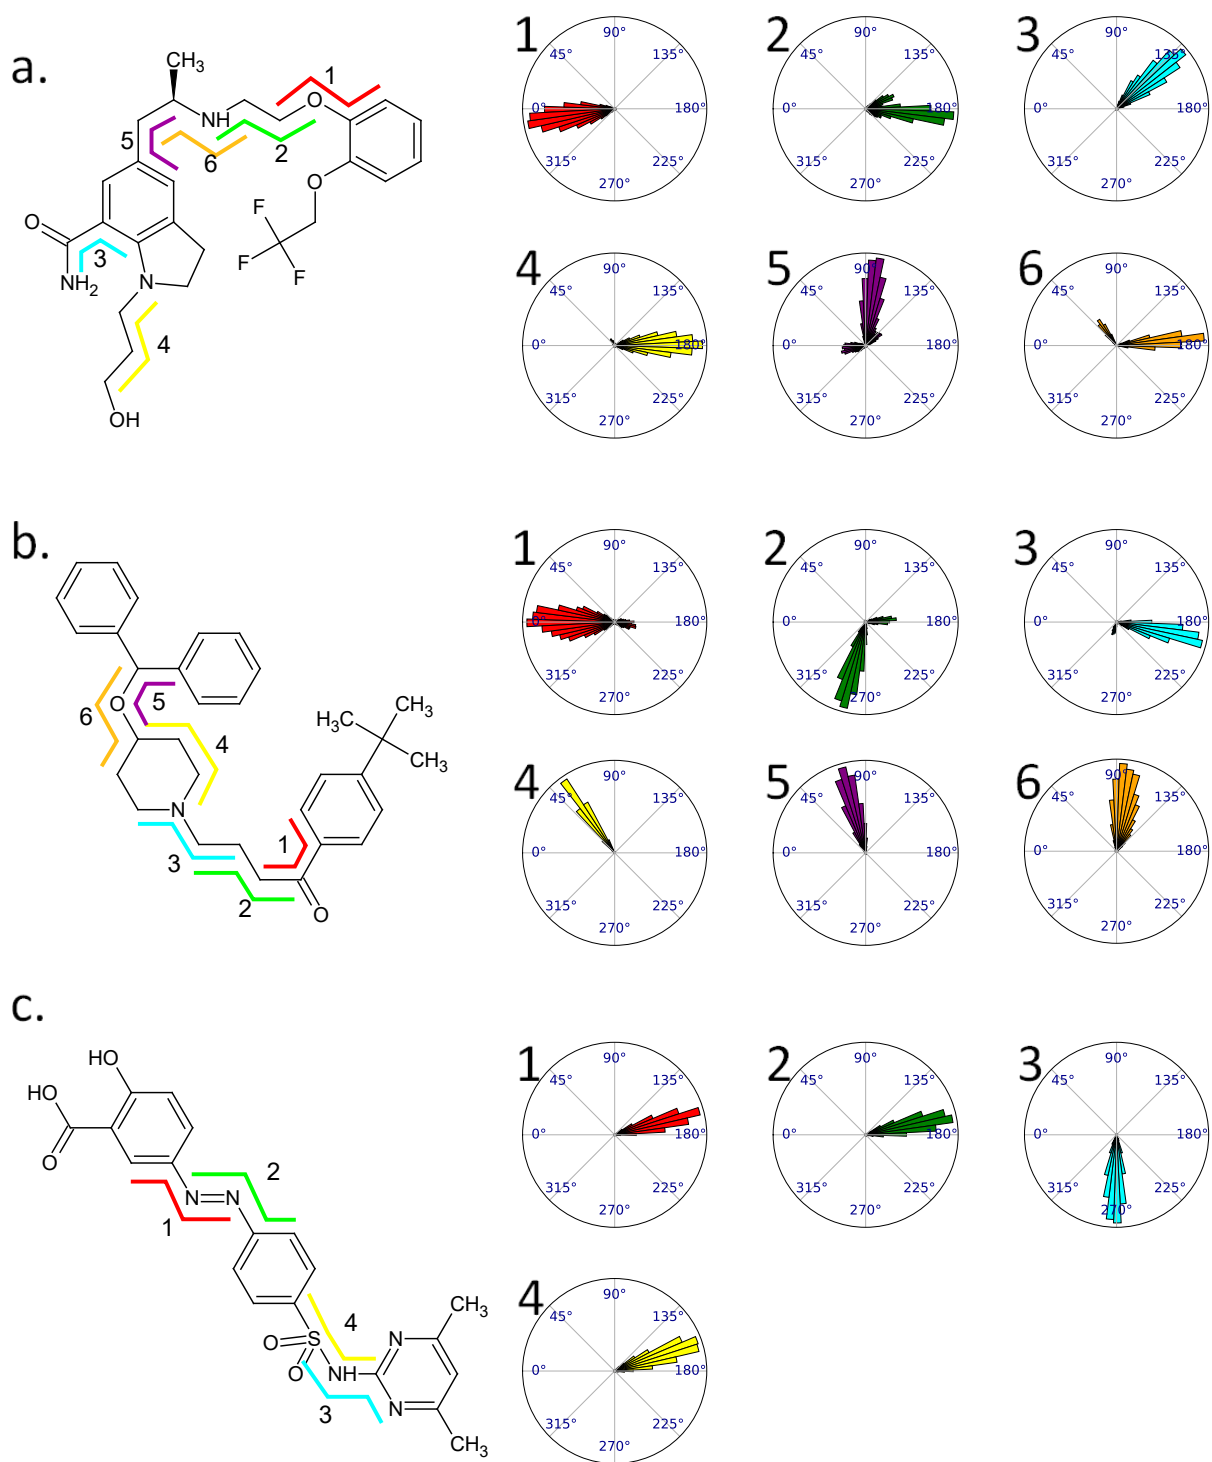

**Figure S4.** Polar histograms for selected torsion angles during 100ns MD simulations for the top three compounds based on the relative binding energies; a) silodosin b) ebastine, and c) salazosulfadimidine.
